# Supplementary material for: Comparison Study of Cytotoxicity of Bare and Functionalized Zinc Oxide Nanoparticles
Source: MDPI journal article supplement (doi:10.3390/ijms22179529), 2021-09-02
Supplement: s1 [file s1]

## Supplementary Material

### Comparison study of cytotoxicity of bare and functionalized zinc oxide nanoparticles

Anna Król-Górniak<sup>1,2</sup>. Katarzyna Rafińska<sup>1,2</sup>. Fernanda Monedeiro<sup>1,2</sup>. Paweł Pomastowski<sup>1</sup> and Bogusław Buszewski<sup>1,2\*</sup>

Significant differences among means of the groups were evaluated using one-way analysis of variance (ANOVA). The test was performed employing the software IBM SPSS Statistics v.23. Additionally, Dunnett's post hoc test was performed in order to compare the results from each type of functionalized ZnO NPs in relation to the bare (ZnO\_Chem) NPs. The results of post hoc assay are summarized in the Supplementary Material (**Table S1 – S6**).

**Table S1** The Dunnett post hoc test for MB degradation at different conditions. Cross correlation between each type of functionalized ZnO NPs in comparison to the bare ZnO NPs. The statistically significant correlations ( $p < 0.01$ ) are marked in the red colour

| Dependent variable | Tested samples |          | Significance (p-value) |
|--------------------|----------------|----------|------------------------|
| dark               | ZnO_Intra      | ZnO_Chem | $6.93 \times 10^{-8}$  |
|                    | ZnO_Phyto      |          | $6.45 \times 10^{-8}$  |
|                    | ZnO_Extra      |          | $1.37 \times 10^{-6}$  |
|                    | ZnO_Prot       |          | $7.84 \times 10^{-4}$  |
| sunlight           | ZnO_Intra      | ZnO_Chem | $3.21 \times 10^{-8}$  |
|                    | ZnO_Phyto      |          | $3.22 \times 10^{-8}$  |
|                    | ZnO_Extra      |          | $8.18 \times 10^{-8}$  |
|                    | ZnO_Prot       |          | $3.71 \times 10^{-8}$  |
| UV irradiation     | ZnO_Intra      | ZnO_Chem | $8.22 \times 10^{-3}$  |
|                    | ZnO_Phyto      |          | $9.96 \times 10^{-1}$  |
|                    | ZnO_Extra      |          | $9.54 \times 10^{-1}$  |
|                    | ZnO_Prot       |          | $2.97 \times 10^{-1}$  |
| pH 3               | ZnO_Intra      | ZnO_Chem | $2.04 \times 10^{-2}$  |
|                    | ZnO_Phyto      |          | $2.15 \times 10^{-1}$  |
|                    | ZnO_Extra      |          | $9.97 \times 10^{-1}$  |
|                    | ZnO_Prot       |          | 1.00                   |
| pH 10              | ZnO_Intra      | ZnO_Chem | $4.32 \times 10^{-8}$  |
|                    | ZnO_Phyto      |          | $1.92 \times 10^{-7}$  |
|                    | ZnO_Extra      |          | $4.80 \times 10^{-5}$  |
|                    | ZnO_Prot       |          | $7.36 \times 10^{-6}$  |

**Table S2** The Dunnett post hoc test for MB degradation in various time points. Cross correlation between each type of functionalized ZnO NPs in comparison to the bare ZnO NPs. The statistically significant correlations ( $p < 0.01$ ) are marked in the red colour

| Dependent variable | Tested samples |          | Significance (p-value) |
|--------------------|----------------|----------|------------------------|
| t = 60 min         | ZnO_Intra      | ZnO_Chem | $9.31 \times 10^{-4}$  |
|                    | ZnO_Phyto      |          | $2.34 \times 10^{-5}$  |
|                    | ZnO_Extra      |          | $2.55 \times 10^{-4}$  |
|                    | ZnO_Prot       |          | $1.01 \times 10^{-1}$  |
| t = 180 min        | ZnO_Intra      | ZnO_Chem | $9.10 \times 10^{-6}$  |
|                    | ZnO_Phyto      |          | $4.18 \times 10^{-7}$  |

|                    |           |          |                         |
|--------------------|-----------|----------|-------------------------|
| <b>t = 360 min</b> | ZnO_Extra | ZnO_Chem | 1.78 x 10 <sup>-6</sup> |
|                    | ZnO_Prot  |          | 3.50 x 10 <sup>-2</sup> |
|                    | ZnO_Intra |          | 3.02 x 10 <sup>-7</sup> |
|                    | ZnO_Phyto |          | 2.39 x 10 <sup>-7</sup> |
|                    | ZnO_Extra |          | 4.85 x 10 <sup>-8</sup> |
| <b>t = 480 min</b> | ZnO_Prot  | ZnO_Chem | 5.26 x 10 <sup>-2</sup> |
|                    | ZnO_Intra |          | 1.3 x 10 <sup>-5</sup>  |
|                    | ZnO_Phyto |          | 3.61 x 10 <sup>-5</sup> |
|                    | ZnO_Extra |          | 3.67 x 10 <sup>-5</sup> |
|                    | ZnO_Prot  |          | 7.78 x 10 <sup>-2</sup> |
| <b>t = 720 min</b> | ZnO_Intra | ZnO_Chem | 1.02 x 10 <sup>-4</sup> |
|                    | ZnO_Phyto |          | 2.40 x 10 <sup>-5</sup> |
|                    | ZnO_Extra |          | 1.14 x 10 <sup>-5</sup> |
|                    | ZnO_Prot  |          | 1.18 x 10 <sup>-2</sup> |
|                    |           |          |                         |

**Table S3** The Dunnett post hoc test for DPPH assay. Cross correlation between each type of functionalized ZnO NPs in comparison to the bare ZnO NPs. The statistically significant correlations ( $p < 0.01$ ) are marked in the red colour

| Dependent variable    | Tested samples |          | Significance (p-value)  |
|-----------------------|----------------|----------|-------------------------|
| <b>c = 1.56 µg/mL</b> | ZnO_Intra      | ZnO_Chem | 1.10 x 10 <sup>-6</sup> |
|                       | ZnO_Phyto      |          | 1.84 x 10 <sup>-1</sup> |
|                       | ZnO_Extra      |          | 1.88 x 10 <sup>-4</sup> |
|                       | ZnO_Prot       |          | 1.59 x 10 <sup>-3</sup> |
| <b>c = 3.12 µg/mL</b> | ZnO_Intra      | ZnO_Chem | 7.87 x 10 <sup>-7</sup> |
|                       | ZnO_Phyto      |          | 9.96 x 10 <sup>-1</sup> |
|                       | ZnO_Extra      |          | 1.08 x 10 <sup>-5</sup> |
|                       | ZnO_Prot       |          | 6.94 x 10 <sup>-5</sup> |
| <b>c = 6.25 µg/mL</b> | ZnO_Intra      | ZnO_Chem | 4.45 x 10 <sup>-5</sup> |
|                       | ZnO_Phyto      |          | 9.77 x 10 <sup>-1</sup> |
|                       | ZnO_Extra      |          | 1.60 x 10 <sup>-5</sup> |
|                       | ZnO_Prot       |          | 6.15 x 10 <sup>-3</sup> |
| <b>c = 12.5 µg/mL</b> | ZnO_Intra      | ZnO_Chem | 9.95 x 10 <sup>-1</sup> |
|                       | ZnO_Phyto      |          | 3.93 x 10 <sup>-2</sup> |
|                       | ZnO_Extra      |          | 3.09 x 10 <sup>-1</sup> |
|                       | ZnO_Prot       |          | 2.70 x 10 <sup>-5</sup> |
| <b>c = 25 µg/mL</b>   | ZnO_Intra      | ZnO_Chem | 4.42 x 10 <sup>-1</sup> |
|                       | ZnO_Phyto      |          | 9.98 x 10 <sup>-1</sup> |
|                       | ZnO_Extra      |          | 3.02 x 10 <sup>-1</sup> |
|                       | ZnO_Prot       |          | 5.54 x 10 <sup>-6</sup> |
| <b>c = 50 µg/mL</b>   | ZnO_Intra      | ZnO_Chem | 5.17 x 10 <sup>-3</sup> |
|                       | ZnO_Phyto      |          | 9.63 x 10 <sup>-1</sup> |
|                       | ZnO_Extra      |          | 2.86 x 10 <sup>-3</sup> |
|                       | ZnO_Prot       |          | 1.14 x 10 <sup>-6</sup> |
| <b>c = 100 µg/mL</b>  | ZnO_Intra      | ZnO_Chem | 4.84 x 10 <sup>-2</sup> |
|                       | ZnO_Phyto      |          | 1.91 x 10 <sup>-1</sup> |
|                       | ZnO_Extra      |          | 2.95 x 10 <sup>-1</sup> |
|                       | ZnO_Prot       |          | 4.18 x 10 <sup>-6</sup> |
| <b>c = 200 µg/mL</b>  | ZnO_Intra      | ZnO_Chem | 9.97 x 10 <sup>-1</sup> |
|                       | ZnO_Phyto      |          | 5.02 x 10 <sup>-2</sup> |
|                       | ZnO_Extra      |          | 6.67 x 10 <sup>-1</sup> |
|                       | ZnO_Prot       |          | 3.43 x 10 <sup>-4</sup> |

**Table S4** The Dunnett post hoc test for MTT viability assay. Cross correlation between each type of functionalized ZnO NPs in comparison to the bare ZnO NPs. The statistically significant correlations ( $p < 0.01$ ) are marked in the red colour

| Dependent variable    | Tested samples | Significance (p-value) |                       |
|-----------------------|----------------|------------------------|-----------------------|
|                       |                | Caco-2 cells           | L929 cells            |
| <b>c = 1.56 µg/mL</b> | ZnO_Intra      | $7.7 \times 10^{-2}$   | $8.86 \times 10^{-4}$ |
|                       | ZnO_Phyto      | $3.09 \times 10^{-2}$  | $7.56 \times 10^{-1}$ |
|                       | ZnO_Extra      | $2.01 \times 10^{-2}$  | $9.85 \times 10^{-1}$ |
|                       | ZnO_Prot       | $1.77 \times 10^{-6}$  | $9.8 \times 10^{-1}$  |
| <b>c = 3.12 µg/mL</b> | ZnO_Intra      | $1.43 \times 10^{-1}$  | $2.46 \times 10^{-6}$ |
|                       | ZnO_Phyto      | $2.09 \times 10^{-2}$  | $8.58 \times 10^{-6}$ |
|                       | ZnO_Extra      | $3.44 \times 10^{-1}$  | $2.17 \times 10^{-1}$ |
|                       | ZnO_Prot       | $6.49 \times 10^{-4}$  | $3.64 \times 10^{-1}$ |
| <b>c = 6.25 µg/mL</b> | ZnO_Intra      | $2.72 \times 10^{-2}$  | $3.06 \times 10^{-3}$ |
|                       | ZnO_Phyto      | $4.24 \times 10^{-2}$  | $2.87 \times 10^{-3}$ |
|                       | ZnO_Extra      | $7.66 \times 10^{-1}$  | $2.58 \times 10^{-1}$ |
|                       | ZnO_Prot       | $2.07 \times 10^{-5}$  | $8.94 \times 10^{-1}$ |
| <b>c = 12.5µg/mL</b>  | ZnO_Intra      | $7.85 \times 10^{-2}$  | $1.96 \times 10^{-4}$ |
|                       | ZnO_Phyto      | $1.33 \times 10^{-1}$  | $1.94 \times 10^{-4}$ |
|                       | ZnO_Extra      | $2.58 \times 10^{-1}$  | $2.19 \times 10^{-4}$ |
|                       | ZnO_Prot       | $1.44 \times 10^{-4}$  | $6.77 \times 10^{-1}$ |
| <b>c = 25 µg/mL</b>   | ZnO_Intra      | $6.39 \times 10^{-5}$  | $3.12 \times 10^{-8}$ |
|                       | ZnO_Phyto      | $5.85 \times 10^{-4}$  | $3.12 \times 10^{-8}$ |
|                       | ZnO_Extra      | $8.51 \times 10^{-4}$  | $3.12 \times 10^{-8}$ |
|                       | ZnO_Prot       | $5.32 \times 10^{-8}$  | $1.12 \times 10^{-3}$ |
| <b>c = 50 µg/mL</b>   | ZnO_Intra      | $3.28 \times 10^{-4}$  | $4.22 \times 10^{-1}$ |
|                       | ZnO_Phyto      | $5.43 \times 10^{-3}$  | $3.82 \times 10^{-1}$ |
|                       | ZnO_Extra      | $8.95 \times 10^{-4}$  | 1                     |
|                       | ZnO_Prot       | $3.58 \times 10^{-8}$  | $9.66 \times 10^{-1}$ |
| <b>c = 100 µg/mL</b>  | ZnO_Intra      | 1                      | $9.98 \times 10^{-1}$ |
|                       | ZnO_Phyto      | $2.21 \times 10^{-2}$  | $6.84 \times 10^{-2}$ |
|                       | ZnO_Extra      | $1.38 \times 10^{-2}$  | $1.87 \times 10^{-1}$ |
|                       | ZnO_Prot       | $3.64 \times 10^{-3}$  | $9.92 \times 10^{-1}$ |
| <b>c = 200 µg/mL</b>  | ZnO_Intra      | $5.00 \times 10^{-1}$  | $8.92 \times 10^{-3}$ |
|                       | ZnO_Phyto      | $1.52 \times 10^{-3}$  | $2.72 \times 10^{-4}$ |
|                       | ZnO_Extra      | $2.04 \times 10^{-3}$  | $4.38 \times 10^{-3}$ |
|                       | ZnO_Prot       | $3.55 \times 10^{-2}$  | 1                     |

**Table S5** The Dunnett post hoc test for LDH membrane integrity assay. Cross correlation between each type of functionalized ZnO NPs in comparison to the bare ZnO NPs. The statistically significant correlations ( $p < 0.01$ ) are marked in the red colour

| Dependent variable    | Tested samples | Significance (p-value) |                       |
|-----------------------|----------------|------------------------|-----------------------|
|                       |                | Caco-2 cells           | L929 cells            |
| <b>c = 1.56 µg/mL</b> | ZnO_Intra      | $7.39 \times 10^{-2}$  | $3.5 \times 10^{-8}$  |
|                       | ZnO_Phyto      | $4.92 \times 10^{-1}$  | $6.28 \times 10^{-1}$ |
|                       | ZnO_Extra      | $7.12 \times 10^{-1}$  | $1.84 \times 10^{-2}$ |
|                       | ZnO_Prot       | $4.51 \times 10^{-1}$  | $9.74 \times 10^{-1}$ |
| <b>c = 3.12 µg/mL</b> | ZnO_Intra      | $1.7 \times 10^{-6}$   | $3.21 \times 10^{-8}$ |
|                       | ZnO_Phyto      | $6.99 \times 10^{-1}$  | $9.62 \times 10^{-1}$ |
|                       | ZnO_Extra      | $5.11 \times 10^{-1}$  | $3.21 \times 10^{-8}$ |

|                       |           |          |                       |                          |
|-----------------------|-----------|----------|-----------------------|--------------------------|
|                       | ZnO_Prot  |          | $4.86 \times 10^{-1}$ | 1                        |
| <b>c = 6.25 µg/mL</b> | ZnO_Intra | ZnO_Chem | $3.22 \times 10^{-8}$ | $3.21 \times 10^{-8}$    |
|                       | ZnO_Phyto |          | $6.94 \times 10^{-3}$ | $3.21 \times 10^{-8}$    |
|                       | ZnO_Extra |          | $3.21 \times 10^{-8}$ | $3.21 \times 10^{-8}$    |
|                       | ZnO_Prot  |          | $8.45 \times 10^{-1}$ | $9.51 \times 10^{-1}$    |
| <b>c = 12.5µg/mL</b>  | ZnO_Intra | ZnO_Chem | $6.72 \times 10^{-1}$ | $3.21 \times 10^{-8}$    |
|                       | ZnO_Phyto |          | $1.34 \times 10^{-6}$ | $3.21 \times 10^{-8}$    |
|                       | ZnO_Extra |          | $9.29 \times 10^{-1}$ | $3.21 \times 10^{-8}$    |
|                       | ZnO_Prot  |          | 1                     | 1                        |
| <b>c = 25 µg/mL</b>   | ZnO_Intra | ZnO_Chem | $6.33 \times 10^{-1}$ | $4.71 \times 10^{-6}$    |
|                       | ZnO_Phyto |          | $2.07 \times 10^{-4}$ | $3.38 \times 10^{-8}$    |
|                       | ZnO_Extra |          | $7.86 \times 10^{-5}$ | $3.24 \times 10^{-8}$    |
|                       | ZnO_Prot  |          | $6.76 \times 10^{-1}$ | $2.03 \times 10^{-1}$    |
| <b>c = 50 µg/mL</b>   | ZnO_Intra | ZnO_Chem | $1.39 \times 10^{-3}$ | $3.51 \times 10^{-8}$    |
|                       | ZnO_Phyto |          | $7.83 \times 10^{-4}$ | $1.91 \times 10^{-2}$    |
|                       | ZnO_Extra |          | $3.46 \times 10^{-4}$ | $6.42.66 \times 10^{-1}$ |
|                       | ZnO_Prot  |          | 1                     | $9.97 \times 10^{-1}$    |
| <b>c = 100 µg/mL</b>  | ZnO_Intra | ZnO_Chem | $3.25 \times 10^{-8}$ | $8.92 \times 10^{-3}$    |
|                       | ZnO_Phyto |          | $4.66 \times 10^{-6}$ | $3.21 \times 10^{-8}$    |
|                       | ZnO_Extra |          | $2.4 \times 10^{-5}$  | $5.58 \times 10^{-5}$    |
|                       | ZnO_Prot  |          | $3.46 \times 10^{-6}$ | $9.48 \times 10^{-1}$    |
| <b>c = 200 µg/mL</b>  | ZnO_Intra | ZnO_Chem | $3.38 \times 10^{-8}$ | $4.39 \times 10^{-8}$    |
|                       | ZnO_Phyto |          | $4.04 \times 10^{-8}$ | $9.23 \times 10^{-8}$    |
|                       | ZnO_Extra |          | $4.01 \times 10^{-8}$ | $2.59 \times 10^{-3}$    |
|                       | ZnO_Pro   |          | $3.29 \times 10^{-6}$ | $8.27 \times 10^{-3}$    |

**Table S6** The Dunnett post hoc test for ROS generation assay. Cross correlation between each type of functionalized ZnO NPs in comparison to the bare ZnO NPs. The statistically significant correlations ( $p < 0.01$ ) are marked in the red colour

| Dependent variable    | Tested samples | Significance (p-value)<br>Caco-2 | Significance (p-value)<br>L929 |
|-----------------------|----------------|----------------------------------|--------------------------------|
| <b>c = 1.56 µg/mL</b> | ZnO_Intra      | ZnO_Chem                         | $3.24 \times 10^{-8}$          |
|                       | ZnO_Phyto      |                                  | $3.75 \times 10^{-8}$          |
|                       | ZnO_Extra      |                                  | $6.31 \times 10^{-8}$          |
|                       | ZnO_Prot       |                                  | $3.71 \times 10^{-1}$          |
| <b>c = 3.12 µg/mL</b> | ZnO_Intra      | ZnO_Chem                         | $3.92 \times 10^{-8}$          |
|                       | ZnO_Phyto      |                                  | $1.02 \times 10^{-7}$          |
|                       | ZnO_Extra      |                                  | $5.07 \times 10^{-8}$          |
|                       | ZnO_Prot       |                                  | $4.63 \times 10^{-3}$          |
| <b>c = 6.25 µg/mL</b> | ZnO_Intra      | ZnO_Chem                         | $3.22 \times 10^{-8}$          |
|                       | ZnO_Phyto      |                                  | $3.22 \times 10^{-8}$          |
|                       | ZnO_Extra      |                                  | $3.22 \times 10^{-8}$          |
|                       | ZnO_Prot       |                                  | $3.22 \times 10^{-8}$          |
| <b>c = 12.5µg/mL</b>  | ZnO_Intra      | ZnO_Chem                         | $6.12 \times 10^{-8}$          |
|                       | ZnO_Phyto      |                                  | $5.95 \times 10^{-8}$          |
|                       | ZnO_Extra      |                                  | $5.14 \times 10^{-8}$          |
|                       | ZnO_Prot       |                                  | $8.87 \times 10^{-8}$          |
| <b>c = 25 µg/mL</b>   | ZnO_Intra      | ZnO_Chem                         | $2.31 \times 10^{-1}$          |
|                       | ZnO_Phyto      |                                  | $5.78 \times 10^{-1}$          |
|                       | ZnO_Extra      |                                  | $1.04 \times 10^{-1}$          |
|                       | ZnO_Prot       |                                  | $5.62 \times 10^{-2}$          |
| <b>c = 50 µg/mL</b>   | ZnO_Intra      | ZnO_Chem                         | $1.10 \times 10^{-1}$          |

|                      |           |          |                       |                       |
|----------------------|-----------|----------|-----------------------|-----------------------|
|                      | ZnO_Phyto |          | $3.76 \times 10^{-1}$ | $9.69 \times 10^{-1}$ |
|                      | ZnO_Extra |          | $4.58 \times 10^{-2}$ | $3.73 \times 10^{-1}$ |
|                      | ZnO_Prot  |          | $3.32 \times 10^{-1}$ | $2.04 \times 10^{-1}$ |
| <b>c = 100 µg/mL</b> | ZnO_Intra |          | $1.22 \times 10^{-1}$ | $1.54 \times 10^{-4}$ |
|                      | ZnO_Phyto | ZnO_Chem | $9.76 \times 10^{-1}$ | $1.04 \times 10^{-2}$ |
|                      | ZnO_Extra |          | $2.67 \times 10^{-1}$ | $1.28 \times 10^{-1}$ |
|                      | ZnO_Prot  |          | $6.44 \times 10^{-2}$ | $8.04 \times 10^{-1}$ |
| <b>c = 200 µg/mL</b> | ZnO_Intra | ZnO_Chem | $1.42 \times 10^{-4}$ | $9.85 \times 10^{-7}$ |
|                      | ZnO_Phyto |          | $1.48 \times 10^{-2}$ | $5.39 \times 10^{-5}$ |
|                      | ZnO_Extra |          | $5.95 \times 10^{-3}$ | $8.10 \times 10^{-7}$ |
|                      | ZnO_Pro   |          | $4.91 \times 10^{-1}$ | $4.85 \times 10^{-1}$ |
